# Supplementary figures and images for: Mining of Self-Organizing Map Gene-Expression Portraits Reveals Prognostic Stratification of HPV-Positive Head and Neck Squamous Cell Carcinoma
Source: MDPI journal article supplement (doi:10.3390/cancers11081057), 2019-07-26

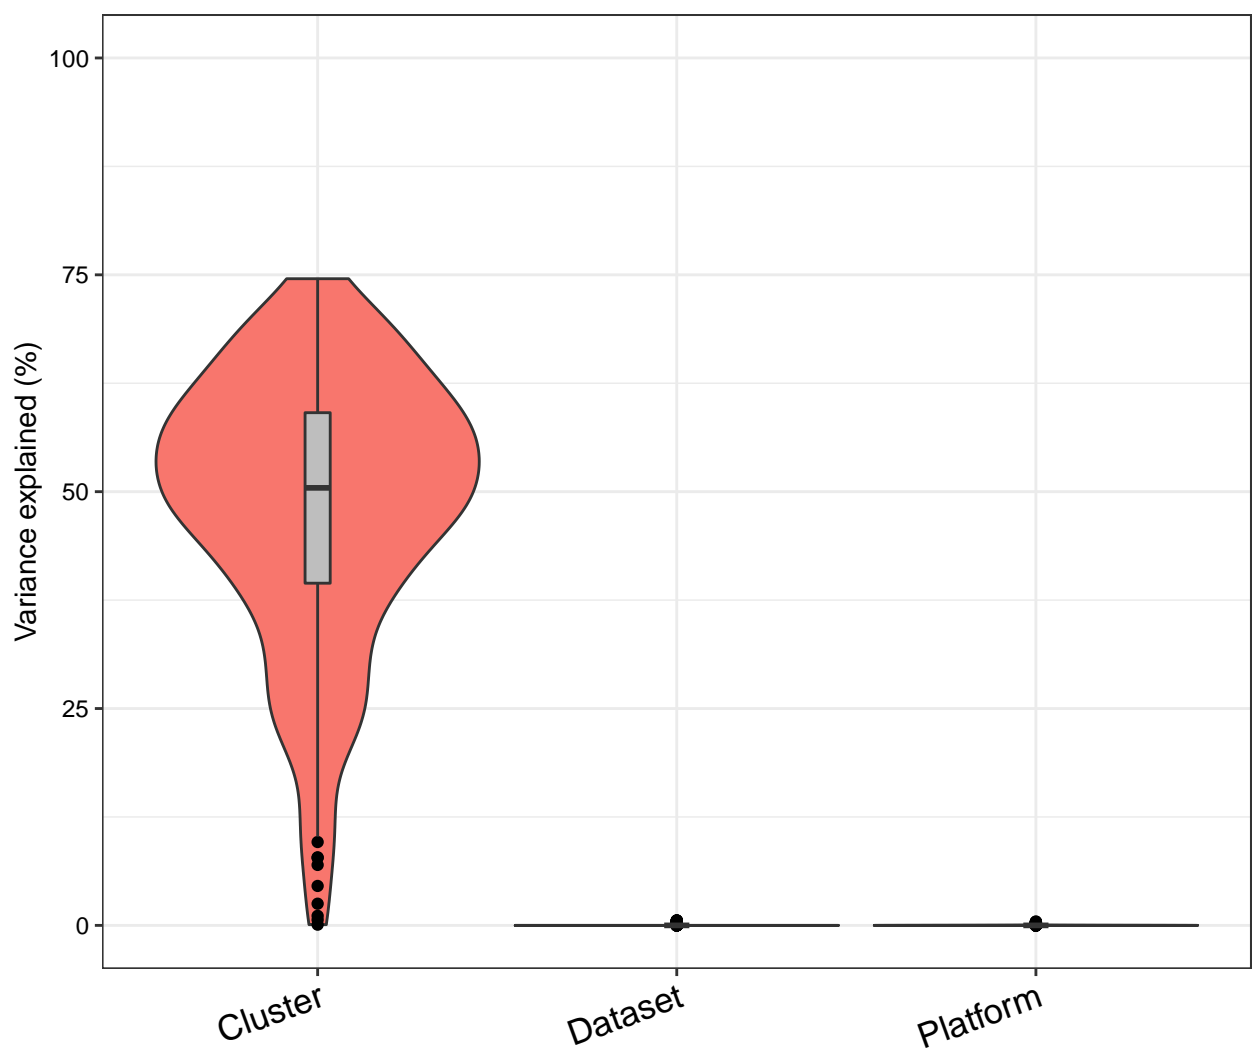

Supplement: s1 [file s1]

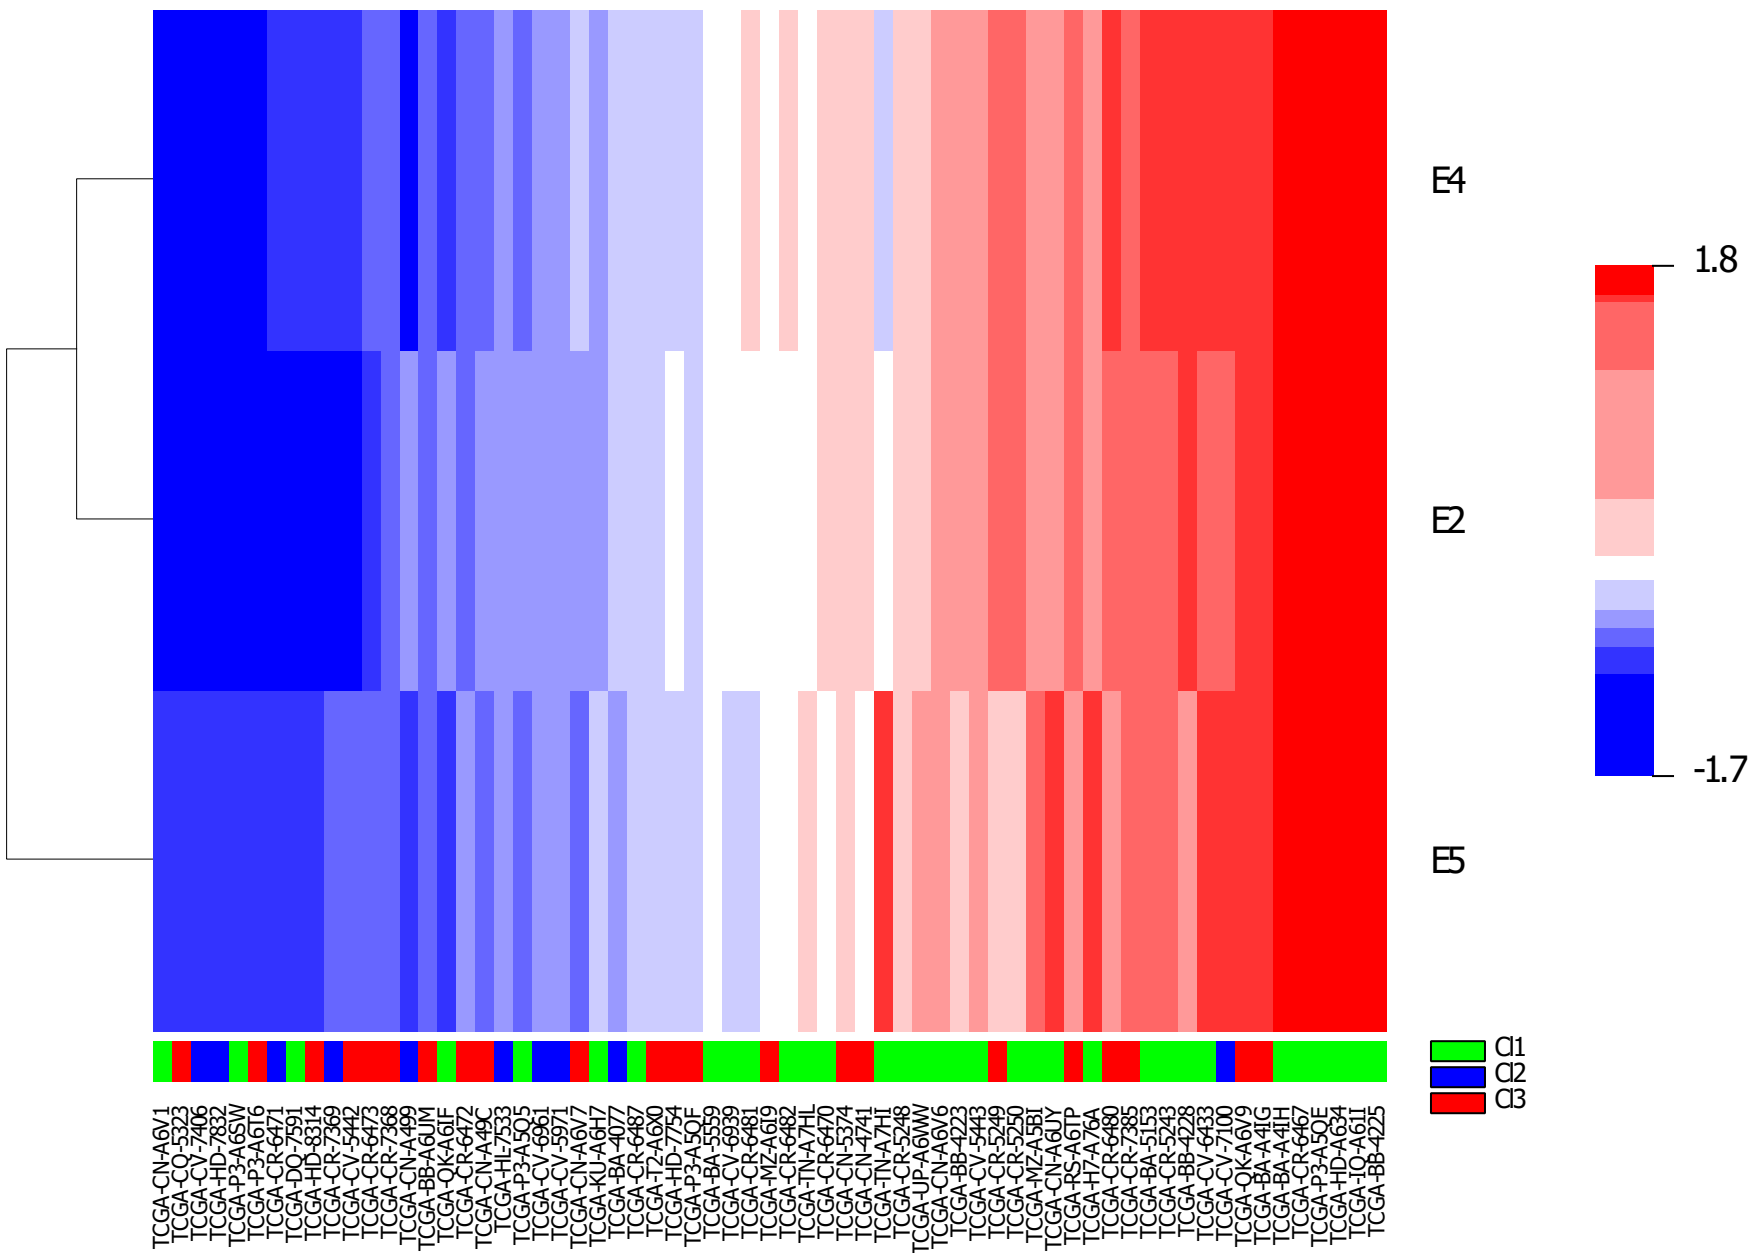

Supplement: s1 [file s1]

# CI1/CI2

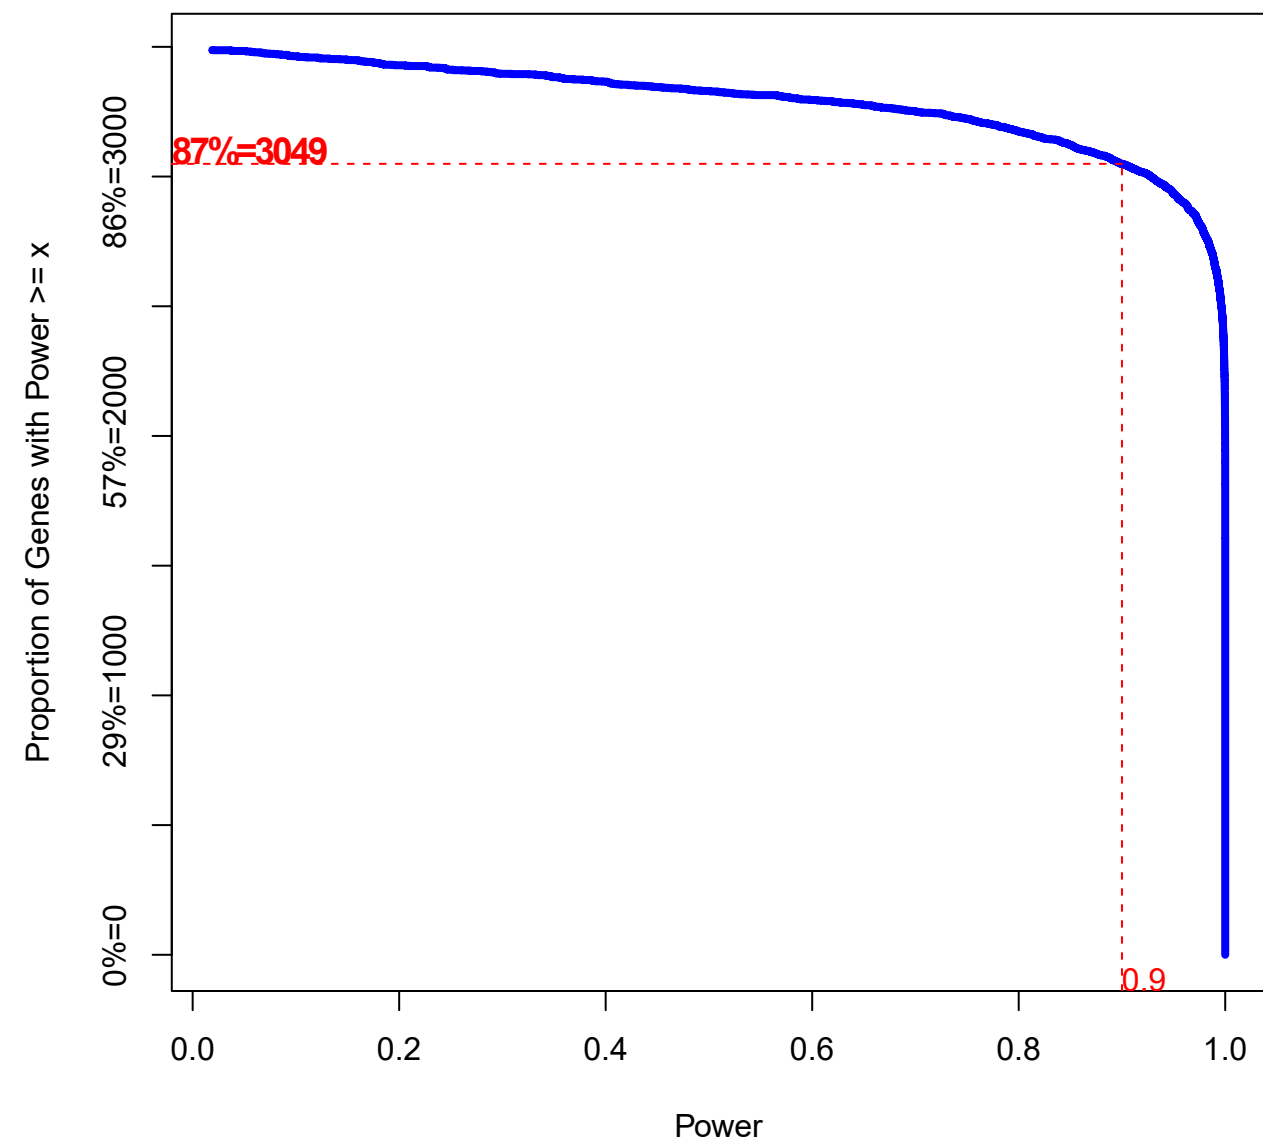

# CI1/CI3

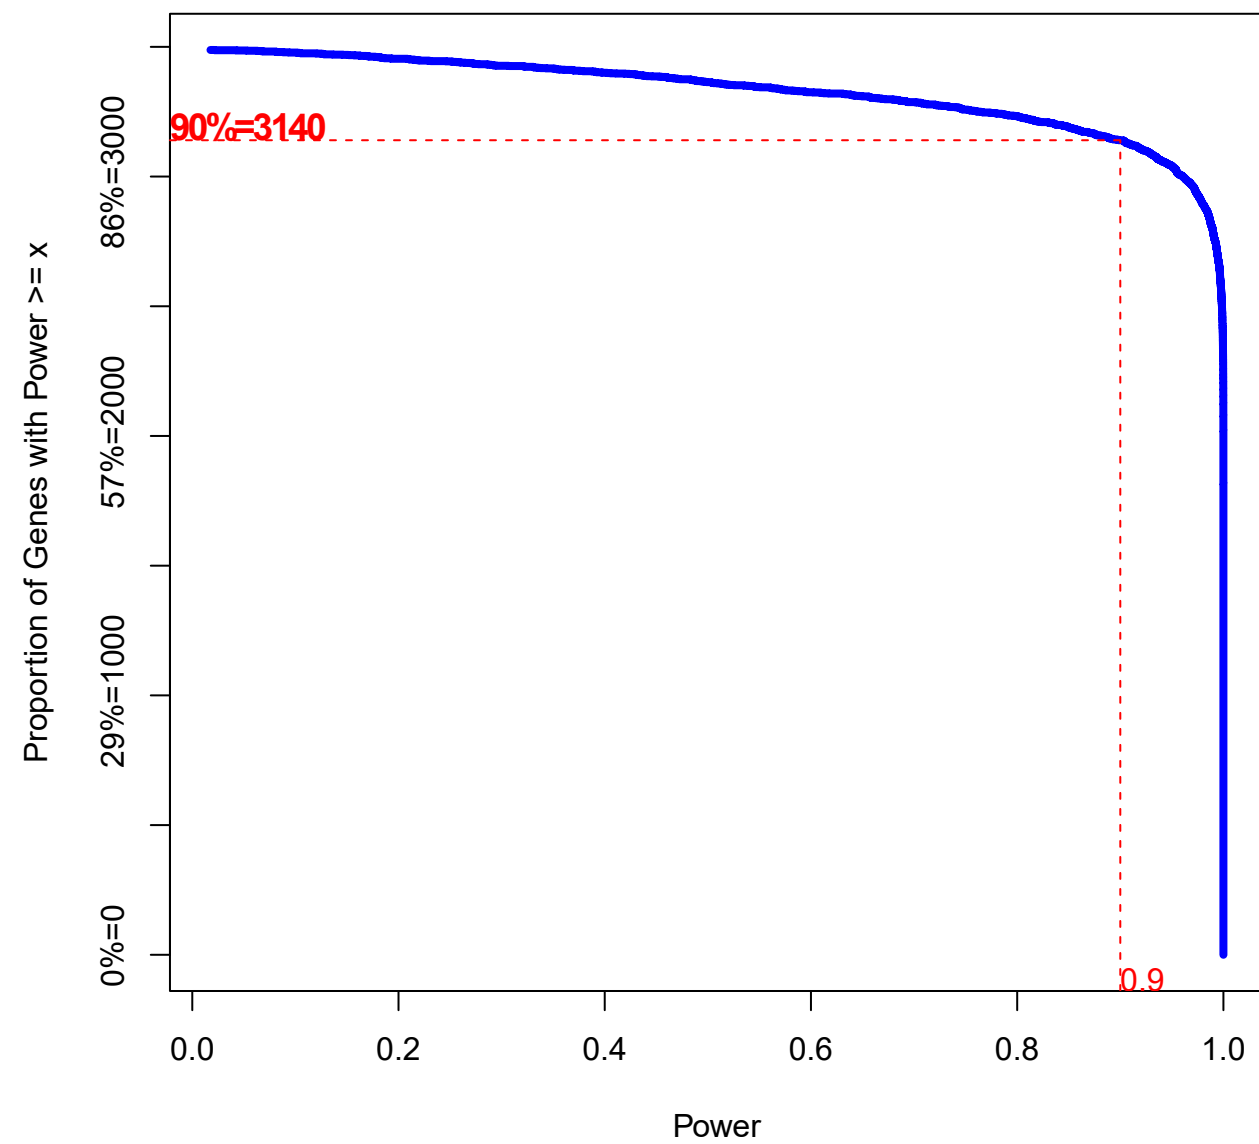

# CI2/CI3

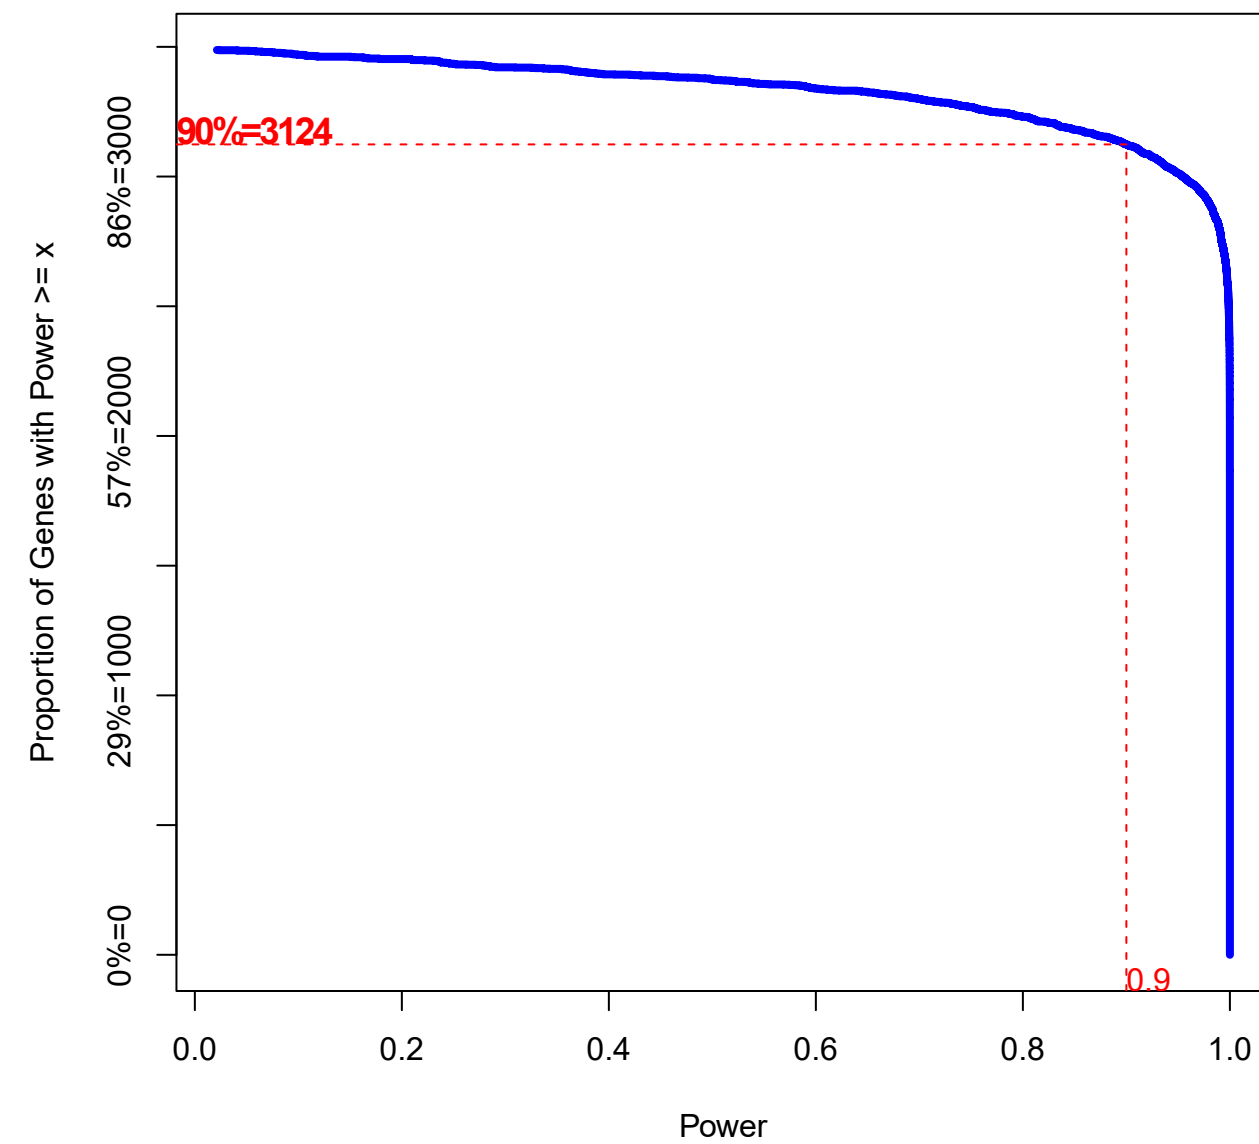

Supplement: s1 [file s1]
